# Supplementary material for: Differences in bulk and microscale yttrium speciation in coal combustion fly ash
Source: Royal Society of Chemistry journal article supplement (doi:10.1039/c8em00264a), 2018-01-01
Supplement: c8em00264a1.pdf [file c8em00264a1.pdf]

**Supporting Information for**

**Differences in Bulk and Microscale Yttrium Speciation in Coal  
Combustion Fly Ash**

**Ross K. Taggart <sup>1</sup>, Nelson A. Rivera <sup>1</sup>, Clément Levard <sup>2</sup>, Jean-Paul Ambrosi <sup>2</sup>, Daniel  
Borschneck <sup>2</sup>, James C. Hower <sup>3</sup>, and Heileen Hsu-Kim <sup>1,\*</sup>**

<sup>1</sup> Department of Civil and Environmental Engineering, Duke University, Durham, NC 27708,  
USA

<sup>2</sup> Aix Marseille Univ, CNRS, IRD, INRA, Coll France, CEREGE, Aix-en-Provence, France

<sup>3</sup> Center for Applied Energy Research, University of Kentucky, Lexington, KY 40511, USA

\*Corresponding author: Heileen Hsu-Kim (email: [hsukim@duke.edu](mailto:hsukim@duke.edu); phone +1-919-660-5109).

**Table S1.** Coal fly ash samples selected for each analysis. Feed coals originated from the Illinois Basin (IL), Appalachian Basin (App), and Powder River Basin (PRB) in the U.S. and the Witbank/Highveld coal fields in South Africa (RSA). The leachable REE in the samples were quantified by selective sequential extraction (SSE) while the solid crystalline phases were characterized by x-ray diffraction (XRD). Element maps were acquired via micro-focus x-ray fluorescence ( $\mu$ XRF) and yttrium speciation was analyzed using bulk and micro-focus x-ray absorption near edge spectroscopy (XANES). Sample numbers correspond to those used in Taggart et al. (2016)

| <b>Sample ID</b> | <b>Sample No.</b> | <b>Ash Type</b> | <b>SSE/XRD<sup>a</sup></b> | <b>Bulk XANES<sup>a</sup></b> | <b><math>\mu</math>XRF<sup>b</sup></b> | <b><math>\mu</math>XANES<sup>b</sup></b> |
|------------------|-------------------|-----------------|----------------------------|-------------------------------|----------------------------------------|------------------------------------------|
| App-FA1          | 93938             | Silo            | X                          | X                             | X                                      | X                                        |
| App-FA2          | 93963             | ESP             |                            | X                             | X                                      |                                          |
| App-FA3          | 93932             | ESP             |                            | X                             | X                                      | X                                        |
| App-PA           | 93965             | Pond            |                            | X                             | X                                      |                                          |
| IL-FA1           | 93895             | ESP             | X                          | X                             | X                                      | X                                        |
| IL-FA3           | 93964             | ESP             |                            | X                             | X                                      |                                          |
| PRB-FA1          | 93966             | Fly ash         | X                          | X                             | X                                      | X                                        |
| PRB-FA2          | 93973             | Fly ash         |                            | X                             | X                                      | X                                        |
| RSA-FA1          | 93969             | Fly ash         |                            | X                             | X                                      |                                          |

<sup>a</sup> bulk ash

<sup>b</sup> thin sections mounted on quartz slides

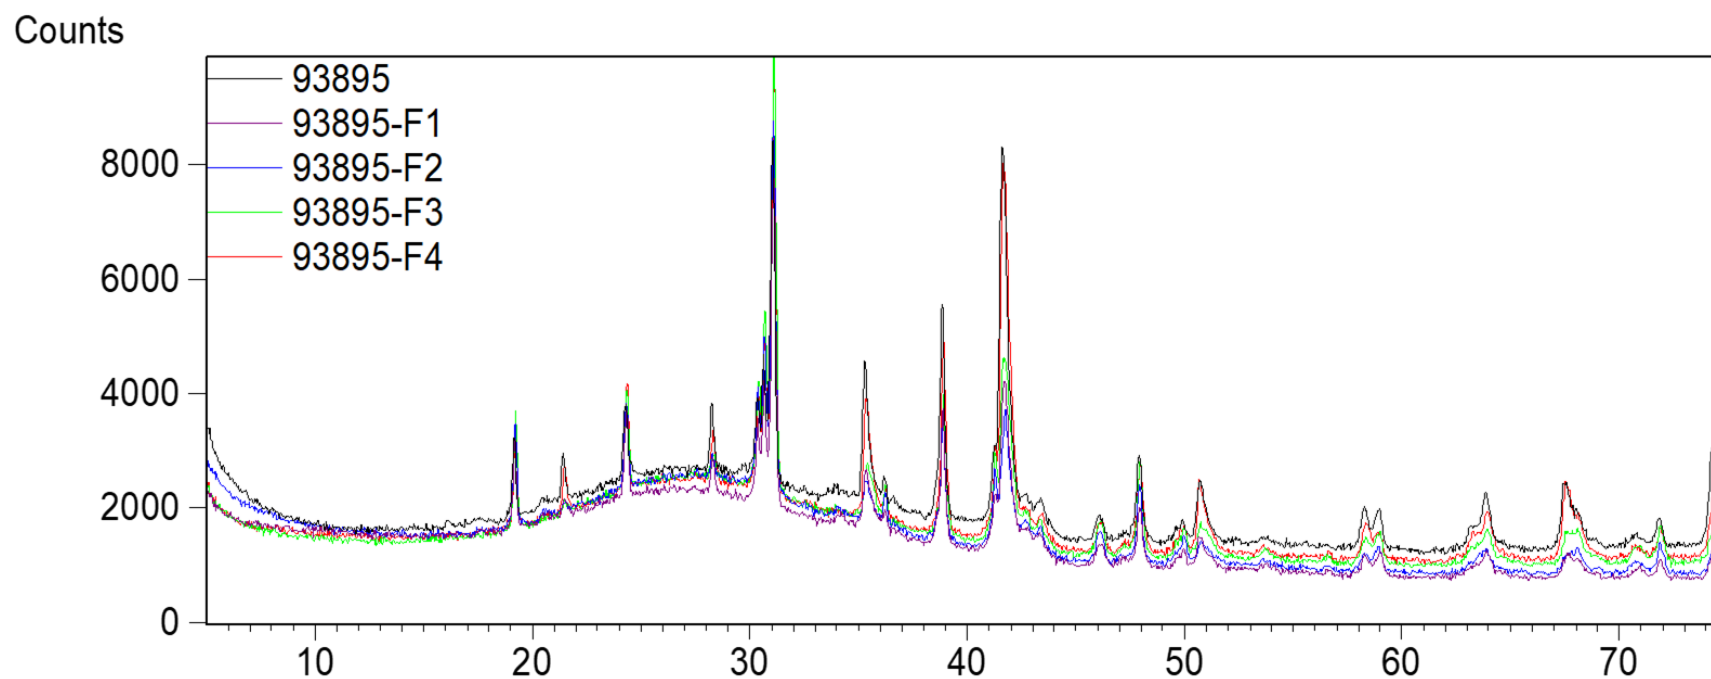

**Figure S1.** XRD spectra with background for IL-FA1. The target fractions were: water soluble (F1), acid soluble (F2), reducible (F3), and oxidizable (F4). The leaching solutions were distilled water (F1), 0.11 M  $\text{CH}_3\text{COOH}$  (F2), pH 2  $\text{NH}_2\text{OH}\cdot\text{HCl}$  (F3), and  $\text{H}_2\text{O}_2/\text{CH}_3\text{COONH}_4$  (F4).

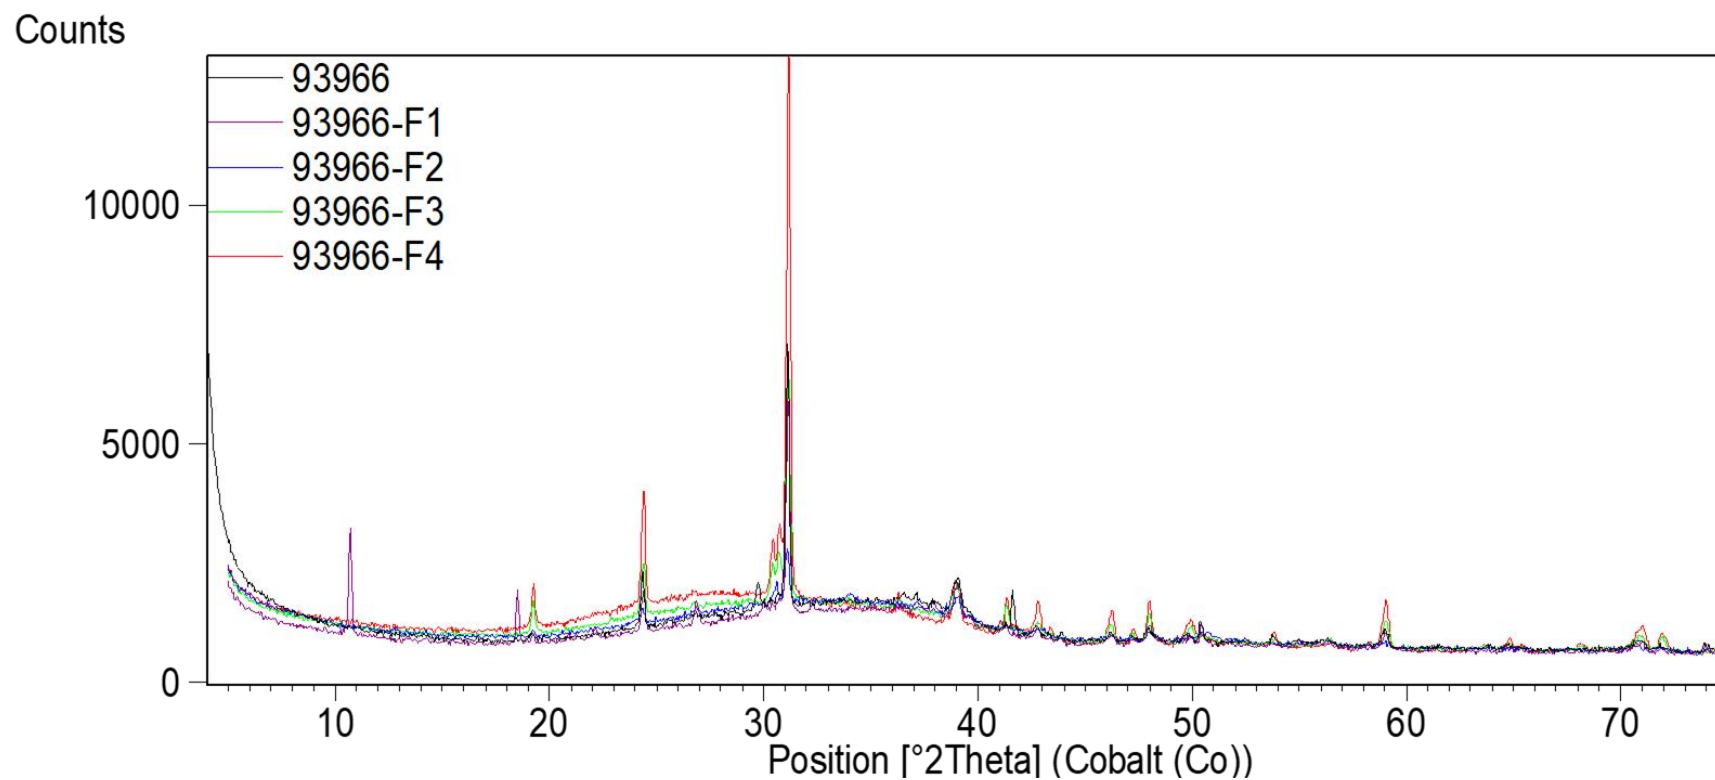

**Figure S2.** XRD spectra with background for PRB-FA1. The target fractions were: water soluble (F1), acid soluble (F2), reducible (F3), and oxidizable (F4). The leaching solutions were distilled water (F1), 0.11 M  $\text{CH}_3\text{COOH}$  (F2), pH 2  $\text{NH}_2\text{OH}\cdot\text{HCl}$  (F3), and  $\text{H}_2\text{O}_2/\text{CH}_3\text{COONH}_4$  (F4).

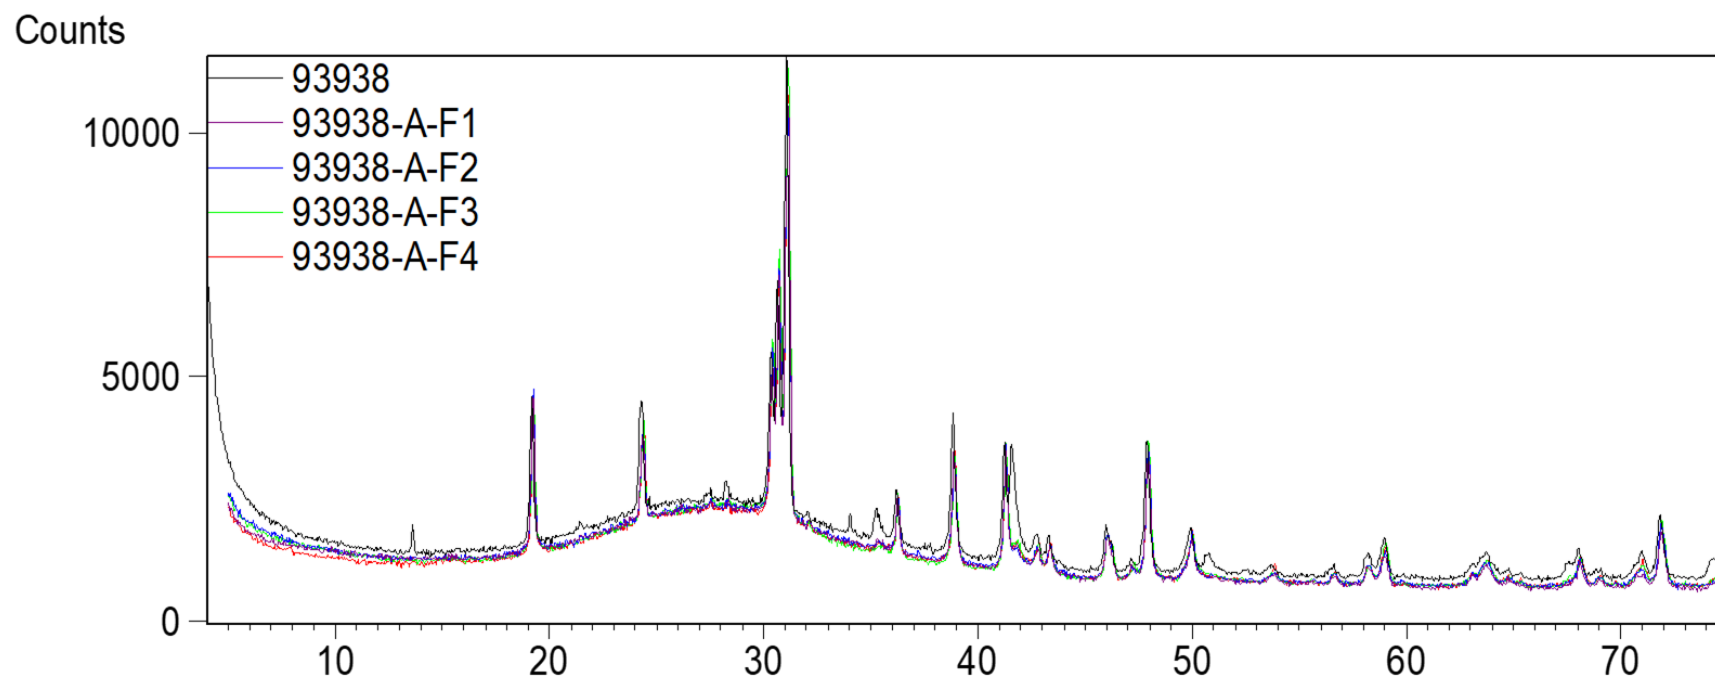

**Figure S3.** XRD spectra with background for App-FA1 extracted with acetic acid in F2. The target fractions were: water soluble (F1), acid soluble (F2), reducible (F3), and oxidizable (F4). The leaching solutions were distilled water (F1), 0.11 M  $\text{CH}_3\text{COOH}$  (F2), pH 2  $\text{NH}_2\text{OH}\cdot\text{HCl}$  (F3), and  $\text{H}_2\text{O}_2/\text{CH}_3\text{COONH}_4$  (F4).

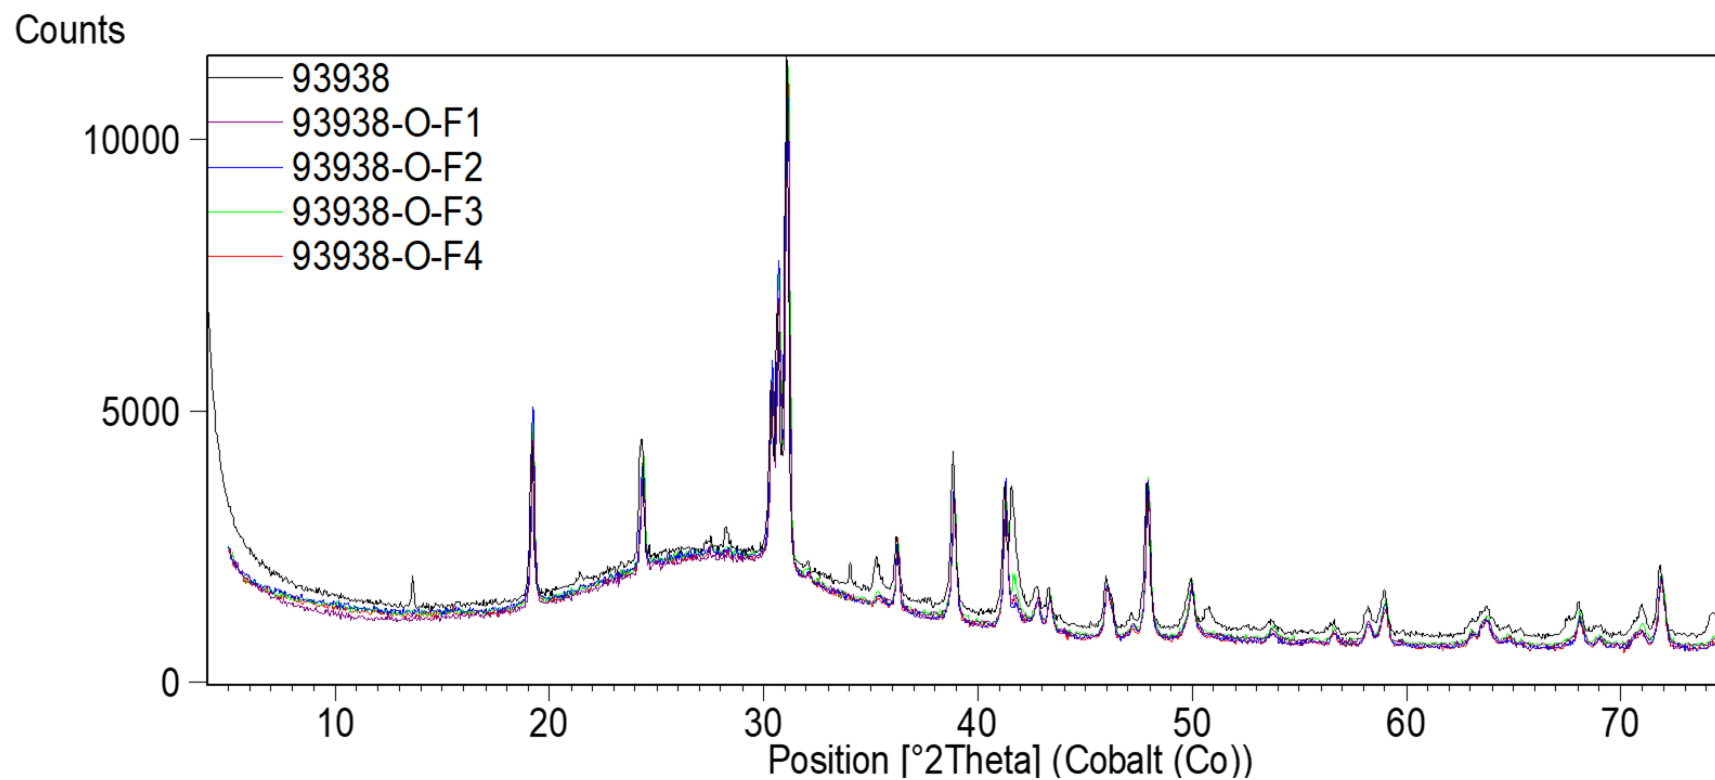

**Figure S4.** XRD spectra with background for App-FA1 extracted with oxalic acid in F2. The target fractions were: water soluble (F1), acid soluble (F2), reducible (F3), and oxidizable (F4). The leaching solutions were distilled water (F1), 0.11 M HOCCOOH (F2), pH 2  $\text{NH}_2\text{OH}\cdot\text{HCl}$  (F3), and  $\text{H}_2\text{O}_2/\text{CH}_3\text{COONH}_4$  (F4).

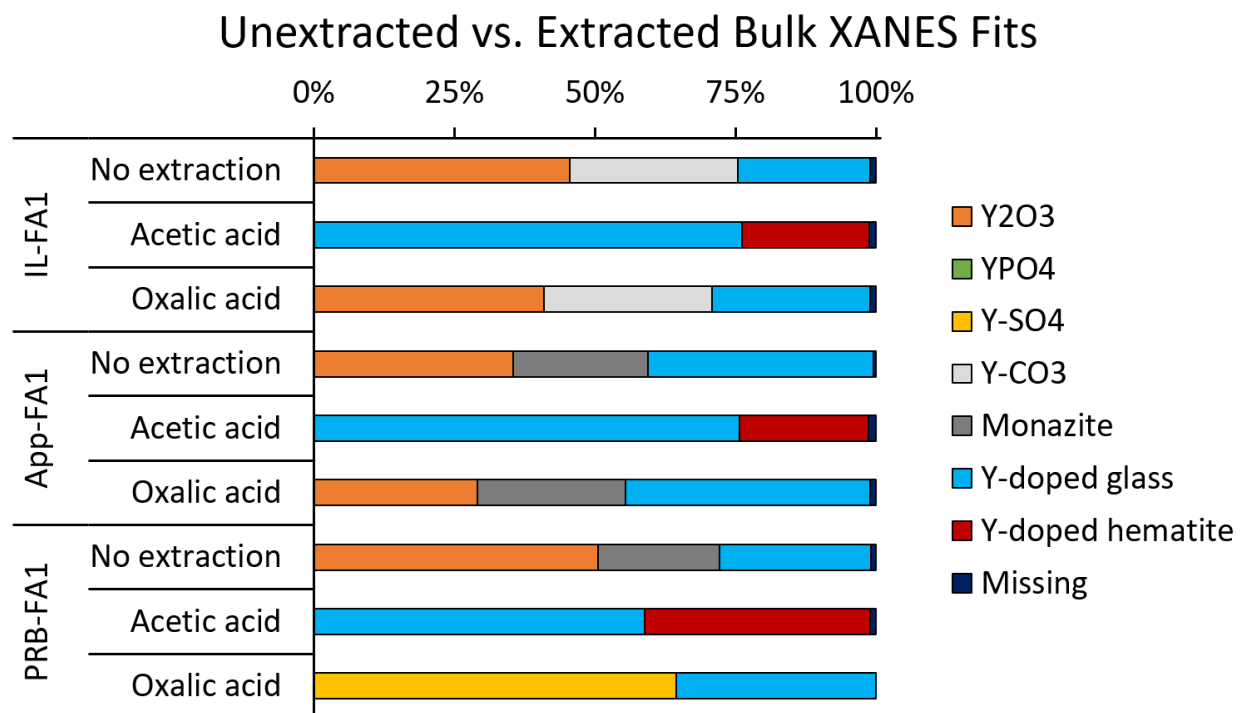

**Figure S5.** Linear combination fits for unextracted and extracted fly ash samples. For the acetic acid and oxalic acid extractions, ash samples were leached overnight in 0.11 mol/L acetic acid or 0.11 mol/L oxalic acid, rinsed with MilliQ water, and dried prior to XANES sample preparation. The fitting region was 17,008 eV to 17,158 eV.

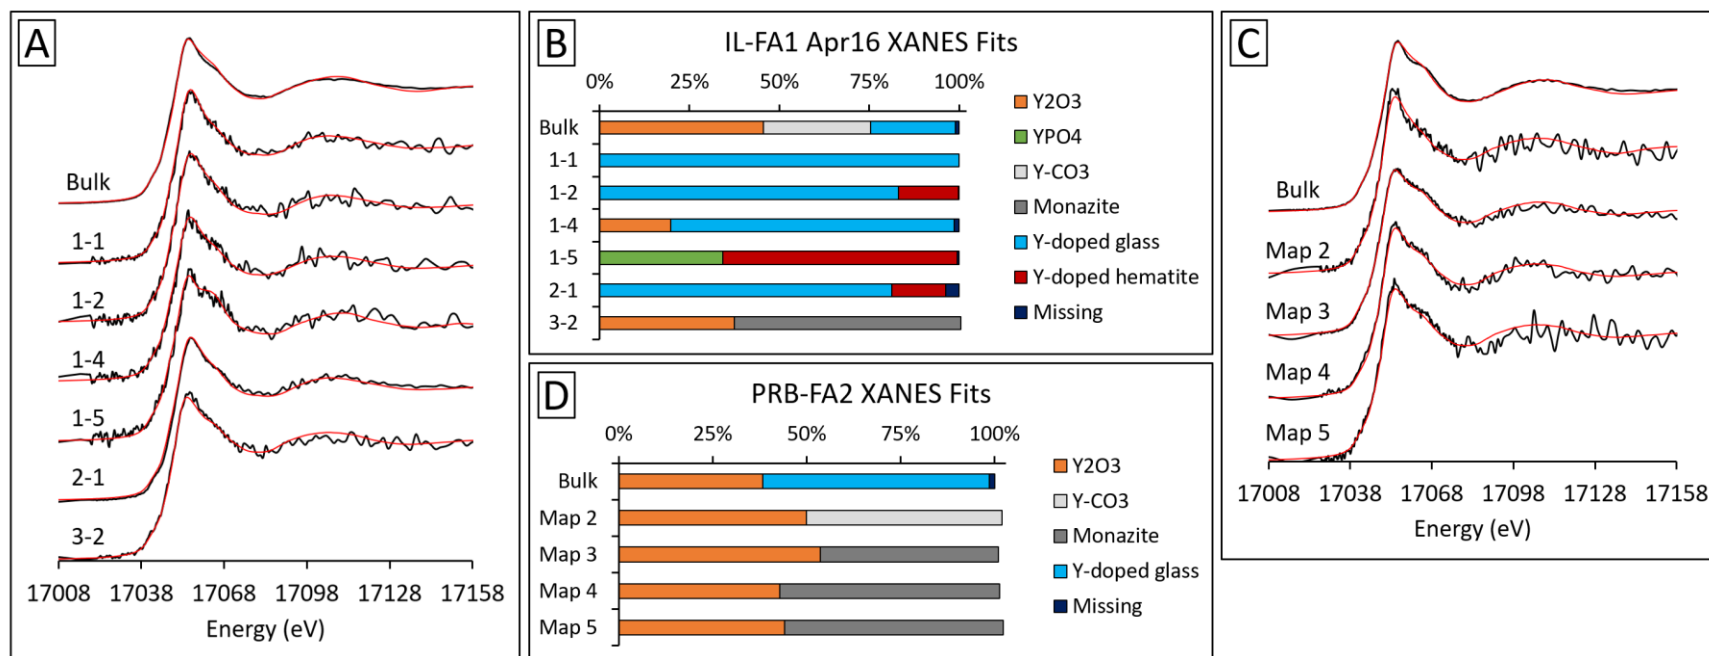

**Figure S6.** April 2016 Synchrotron x-ray spectroscopy analysis for Illinois Basin coal fly ash IL-FA1 and Powder River Basin fly ash PRB-FA2, including: (A)(C) Y K-edge bulk and micro-focus XANES spectra with linear combination fits indicated in red and (B)(D) fit weights. The fitting region was 17,008 eV to 17,158 eV. Multiple points (e.g. P1, P2, P4) were analyzed for several maps (e.g. M1, M2, M3) in IL-FA1.



**Table S2.** Linear combination fits for bulk fly ash samples analyzed using Y K-edge XANES. The fitting region was 17,008 eV to 17,158 eV. “Glass” and “Hematite” denote Y-doped glass and Y-doped hematite standards synthesized in lab. The monazite standard was a geological sample.

| Sample ID | R-factor <sup>a</sup> | Standard Weights              |                                                |                                                |                  |          |       |          |       |
|-----------|-----------------------|-------------------------------|------------------------------------------------|------------------------------------------------|------------------|----------|-------|----------|-------|
|           |                       | Y <sub>2</sub> O <sub>3</sub> | Y <sub>2</sub> (SO <sub>4</sub> ) <sub>3</sub> | Y <sub>2</sub> (CO <sub>3</sub> ) <sub>3</sub> | YPO <sub>4</sub> | Monazite | Glass | Hematite | Sum   |
| App-FA1   | 0.0006481             | 35.5%                         |                                                |                                                |                  | 23.9%    | 40.1% |          | 99.5% |
| App-FA2   | 0.0003731             | 17.7%                         |                                                |                                                | 17.9%            |          | 63.4% |          | 99.0% |
| App-FA3   | 0.0006782             | 38.7%                         |                                                |                                                |                  | 30.8%    | 30.2% |          | 99.7% |
| App-PA    | 0.0007522             | 45.7%                         |                                                | 31.6%                                          |                  |          | 21.7% |          | 99.0% |
| IL-FA1    | 0.0007502             | 45.5%                         |                                                | 29.9%                                          |                  |          | 23.6% |          | 99.0% |
| IL-FA3    | 0.0006524             | 34.4%                         |                                                |                                                |                  | 28.0%    | 36.3% |          | 98.7% |
| PRB-FA1   | 0.0007507             | 50.6%                         |                                                |                                                |                  | 21.6%    | 26.9% |          | 99.1% |
| PRB-FA2   | 0.0007968             | 38.3%                         |                                                |                                                |                  |          | 60.3% |          | 98.6% |
| RSA-FA1   | 0.0003568             | 23.1%                         |                                                |                                                |                  |          | 76.0% |          | 99.1% |

<sup>a</sup> R-factor is a measure of the mean square sum of the misfit of each data point, calculated as

$$\frac{\sum_i (y_{data,i} - y_{fit,i})^2}{\sum_i (y_{data,i})^2}$$

where the sums are over the data points in the fitting region.

**Table S3.** Linear combination fits for bulk fly ash samples extracted with oxalic acid or acetic acid and analyzed using Y K-edge XANES. The fitting region was 17,008 eV to 17,158 eV. Ash samples were leached overnight in 0.11 mol/L oxalic acid or 0.11 mol/L acetic acid, rinsed with MilliQ water, and dried prior to XANES sample preparation. “Glass” and “Hematite” denote Y-doped glass and Y-doped hematite standards synthesized in lab. The monazite standard was a geological sample.

| Oxalic Acid Extraction |           | Standard Weights              |                                                |                                                |                  |          |        |          |        |
|------------------------|-----------|-------------------------------|------------------------------------------------|------------------------------------------------|------------------|----------|--------|----------|--------|
| Sample ID              | R-factor  | Y <sub>2</sub> O <sub>3</sub> | Y <sub>2</sub> (SO <sub>4</sub> ) <sub>3</sub> | Y <sub>2</sub> (CO <sub>3</sub> ) <sub>3</sub> | YPO <sub>4</sub> | Monazite | Glass  | Hematite | Sum    |
| App-FA1                | 0.0004329 | 29.1%                         |                                                | 16.8%                                          |                  | 26.3%    | 43.5%  |          | 98.9%  |
| App-FA2                | 0.0001332 | 14.1%                         |                                                |                                                |                  |          | 85.6%  |          | 99.7%  |
| App-FA3                | 0.0001407 |                               |                                                |                                                |                  | 11.0%    | 70.5%  | 18.1%    | 99.6%  |
| App-PA                 | 0.0001059 |                               |                                                |                                                |                  |          | 100.0% |          | 100.0% |
| IL-FA1                 | 0.0006454 | 41.0%                         |                                                | 29.9%                                          |                  |          | 28.1%  |          | 99.0%  |
| IL-FA3                 | 0.0001699 | 22.9%                         |                                                |                                                |                  | 12.7%    | 63.9%  |          | 99.5%  |
| PRB-FA1                | 0.0009672 |                               | 64.5%                                          |                                                |                  |          | 35.5%  |          | 100.0% |
| PRB-FA2                | 0.0014494 |                               | 46.5%                                          |                                                |                  |          | 53.4%  |          | 99.9%  |
| RSA-FA1                | 0.0001786 | 13.0%                         | 19.6%                                          |                                                |                  |          | 67.4%  |          | 100.0% |

  

| Acetic Acid Extraction |           | Standard Weights              |                                                |                                                |                  |          |       |          |       |
|------------------------|-----------|-------------------------------|------------------------------------------------|------------------------------------------------|------------------|----------|-------|----------|-------|
| Sample ID              | R-factor  | Y <sub>2</sub> O <sub>3</sub> | Y <sub>2</sub> (SO <sub>4</sub> ) <sub>3</sub> | Y <sub>2</sub> (CO <sub>3</sub> ) <sub>3</sub> | YPO <sub>4</sub> | Monazite | Glass | Hematite | Sum   |
| App-FA1                | 0.0005174 |                               |                                                |                                                |                  |          | 75.8% | 22.9%    | 98.7% |
| IL-FA1                 | 0.0005494 |                               |                                                |                                                |                  |          | 76.1% | 22.7%    | 98.8% |
| PRB-FA1                | 0.001715  |                               |                                                |                                                |                  |          | 58.9% | 40.0%    | 98.9% |

**Table S4.** Linear combination fits for  $\mu$ XANES spectra of high Y points in fly ash thin sections collected in February 2017. The fitting region was 17,008 eV to 17,158 eV. “Glass” and “Hematite” denote Y-doped glass and Y-doped hematite standards synthesized in lab. The monazite standard was a geological sample.

| Sample ID | Point | R-factor  | Standard Weights              |                                                |                                                |                  |          |       |          |        |
|-----------|-------|-----------|-------------------------------|------------------------------------------------|------------------------------------------------|------------------|----------|-------|----------|--------|
|           |       |           | Y <sub>2</sub> O <sub>3</sub> | Y <sub>2</sub> (SO <sub>4</sub> ) <sub>3</sub> | Y <sub>2</sub> (CO <sub>3</sub> ) <sub>3</sub> | YPO <sub>4</sub> | Monazite | Glass | Hematite | Sum    |
| IL-FA1    | A1    | 0.0017791 | 41.7%                         |                                                |                                                | 59.2%            |          |       |          | 100.9% |
| IL-FA1    | A2    | 0.0018068 | 60.4%                         |                                                | 41.4%                                          |                  |          |       |          | 101.8% |
| IL-FA1    | A3    | 0.0032064 | 53.5%                         |                                                | 49.1%                                          |                  |          |       |          | 102.6% |
| IL-FA1    | B1    | 0.0024086 | 62.7%                         |                                                | 40.2%                                          |                  |          |       |          | 102.9% |
| IL-FA1    | B2    | 0.0036639 | 54.8%                         |                                                | 48.7%                                          |                  |          |       |          | 103.5% |
| IL-FA1    | B3    | 0.0011916 | 36.1%                         |                                                | 34.5%                                          | 31.7%            |          |       |          | 102.3% |
| IL-FA1    | B4    | 0.0023576 | 59.8%                         |                                                | 42.1%                                          |                  |          |       |          | 101.9% |
| IL-FA1    | B5    | 0.0036352 | 57.8%                         |                                                | 44.9%                                          |                  |          |       |          | 102.7% |
| App-FA1   | 1a    | 0.0065006 |                               |                                                |                                                | 50.2%            |          | 45.7% |          | 95.9%  |
| App-FA1   | 1b    | 0.005767  |                               |                                                |                                                | 69.4%            |          | 32.3% |          | 101.7% |
| App-FA1   | 2     | 0.0023778 |                               |                                                |                                                | 73.8%            |          |       | 27.9%    | 101.7% |
| App-FA1   | 3     | 0.0032745 | 46.2%                         |                                                |                                                |                  | 55.2%    |       |          | 101.4% |
| PRB-FA1   | 1a    | 0.0008112 |                               |                                                |                                                | 20.9%            | 23.0%    |       | 56.1%    | 100.0% |
| PRB-FA1   | 1b    | 0.0008479 |                               |                                                |                                                | 19.7%            | 24.2%    |       | 55.5%    | 99.4%  |
| PRB-FA1   | 2     | 0.003727  | 27.2%                         |                                                |                                                |                  |          | 73.1% |          | 100.3% |
| PRB-FA1   | 3     | 0.0062067 |                               |                                                |                                                | 57.1%            |          |       | 44.1%    | 101.2% |
| PRB-FA1   | 4     | 0.0038275 |                               |                                                |                                                | 34.7%            |          |       | 66.2%    | 100.9% |

**Table S5.** Linear combination fits of  $\mu$ XANES spectra for high Y points in fly ash thin sections collected in April 2016. The fitting region was 17,008 eV to 17,158 eV. “Glass” and “Hematite” denote Y-doped glass and Y-doped hematite standards synthesized in lab. The monazite standard was a geological sample.

| Sample ID | Point | R-factor  | Standard Weights              |                                                |                                                |                  |          |        |          |        |
|-----------|-------|-----------|-------------------------------|------------------------------------------------|------------------------------------------------|------------------|----------|--------|----------|--------|
|           |       |           | Y <sub>2</sub> O <sub>3</sub> | Y <sub>2</sub> (SO <sub>4</sub> ) <sub>3</sub> | Y <sub>2</sub> (CO <sub>3</sub> ) <sub>3</sub> | YPO <sub>4</sub> | Monazite | Glass  | Hematite | Sum    |
| IL-FA1    | 1-1   | 0.0008895 |                               |                                                |                                                |                  |          | 100.0% |          | 100.0% |
| IL-FA1    | 1-2   | 0.0070887 |                               |                                                |                                                |                  |          | 83.1%  | 16.7%    | 99.8%  |
| IL-FA1    | 1-4   | 0.0080282 | 19.8%                         |                                                |                                                |                  |          | 78.9%  |          | 98.7%  |
| IL-FA1    | 1-5   | 0.010105  |                               |                                                |                                                | 34.3%            |          |        | 65.2%    | 99.5%  |
| IL-FA1    | 2-1   | 0.0025297 |                               |                                                |                                                |                  |          | 81.3%  | 15.0%    | 96.3%  |
| IL-FA1    | 3-2   | 0.0048296 | 37.5%                         |                                                |                                                |                  | 62.9%    |        |          | 100.0% |
| App-FA3   | Map 4 | 0.0014660 |                               |                                                |                                                | 100.0%           |          |        |          | 100.0% |
| App-FA3   | Map 6 | 0.0042225 | 35.9%                         |                                                |                                                |                  |          | 64.1%  |          | 100.0% |
| PRB-FA2   | Map 2 | 0.01067   | 49.9%                         |                                                | 52.1%                                          |                  |          |        |          | 102.0% |
| PRB-FA2   | Map 3 | 0.0029029 | 53.7%                         |                                                |                                                |                  | 47.4%    |        |          | 101.1% |
| PRB-FA2   | Map 4 | 0.0058908 | 42.8%                         |                                                |                                                |                  | 58.6%    |        |          | 101.4% |
| PRB-FA2   | Map 5 | 0.012571  | 44.1%                         |                                                |                                                |                  | 58.2%    |        |          | 102.3% |
